# Supplementary material for: The transition metal surface passivated edges of hexagonal boron nitride (h-BN) and the mechanism of h-BN's chemical vapor deposition (CVD) growth
Source: Royal Society of Chemistry journal article supplement (doi:10.1039/c5cp04833h), 2015-01-01
Supplement: c5cp04833h1.pdf [file c5cp04833h1.pdf]

**The transition metal surface passivated edges of hexagonal boron  
nitride (h-BN) and the mechanism of h-BN's chemical vapor deposition  
(CVD) growth**

Ruiqi Zhao<sup>1,2,3</sup>, Feifei Li<sup>2</sup>, Zhirong Liu<sup>3</sup>, Zhongfan Liu<sup>3</sup> and Feng Ding<sup>1,4\*</sup>

<sup>1</sup>Beijing Computational Science Research Center, Beijing 100084, China

<sup>2</sup>School of Physics and Chemistry, Henan Polytechnic University, Henan 454003,  
China

<sup>3</sup>State Key Laboratory for Structural Chemistry of Unstable and Stable Species,  
Beijing National Laboratory for Molecular Sciences (BNLMS), and Center for  
Nanochemistry, College of Chemistry and Molecular Engineering, Peking University,  
Beijing 100871, China

<sup>4</sup>Institute of Textiles and Clothing, Hong Kong Polytechnic University, Kowloon,  
Hong Kong, China

\*Author to whom correspondence should be addressed. [feng.ding@polyu.edu.hk](mailto:feng.ding@polyu.edu.hk).

**Contents:**

- 1. Tests of stable configurations.**
- 2. Edge energies of freestanding h-BN and h-BN on different metals.**
- 3. Magnetism in some typical models.**
- 4. Formation energies vs. orientations, Wulff shapes of h-BN on Cu(111), Ni(111) and Rh(111).**

## 1. Tests of stable configurations.

Tests of stable configurations are performed carefully with 9-ZZ BNNRs (containing 9 zigzag BN chains) on Cu(111) and Ni(111). Six high symmetric configurations,  $B_hN_t$ ,  $B_fN_t$ ,  $B_hN_f$ ,  $B_fN_h$ ,  $B_tN_f$ , and  $B_tN_h$ , which are identified by the positions occupied by B and N atoms, are considered. Figure S1 shows the relative energies of different configurations with respect to that of  $B_hN_t$ . From Fig. S1, we can see that for BNNR  $B_hN_t$  is the most stable one on Cu(111) while is a little less unstable than  $B_fN_h$ . Therefore, the configuration  $B_hN_t$  is used to study the edge stabilities of h-BN on metals in our simulations.

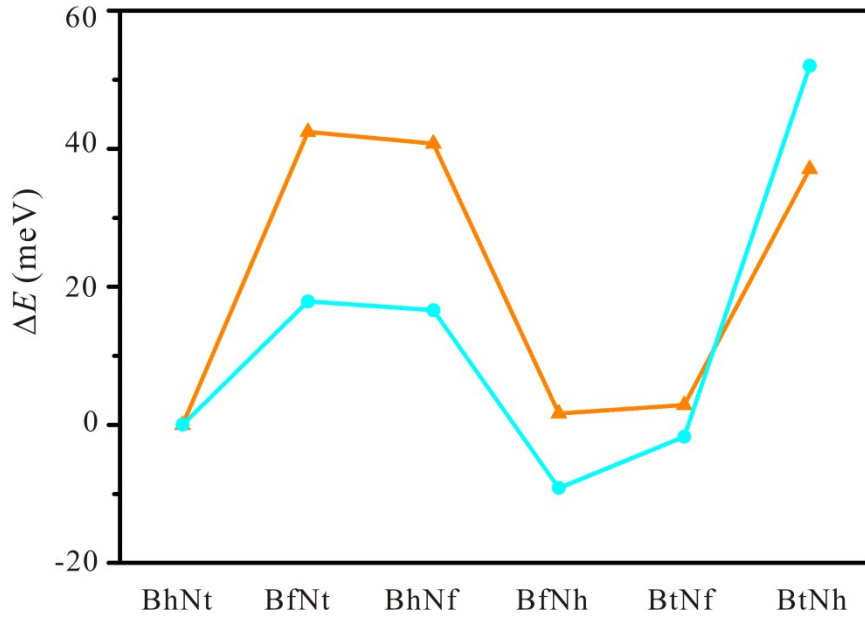

**Fig. S1** Relative energies ( $\Delta E$ ) of different configurations of 9-ZZ BNNR with respect to that of  $B_hN_t$  on the (111) facets of Cu(▲) and Ni(●).

## 2. Edge energies of free standing h-BN and h-BN on different metals.

Table S1 Edge energies of free standing h-BN and h-BN on Cu(111), Ni(111), and Rh(111) at different chemical potential differences ( $\Delta\mu$ ).

| Edge types                                                                                                                                                                        | Edge energies (eV/nm)          |              |         |         |          |                                   |
|-----------------------------------------------------------------------------------------------------------------------------------------------------------------------------------|--------------------------------|--------------|---------|---------|----------|-----------------------------------|
|                                                                                                                                                                                   | $\gamma^0$ ( $\Delta\mu = 0$ ) |              |         |         |          | $\gamma^0$ ( $\Delta\mu \neq 0$ ) |
|                                                                                                                                                                                   | Bare                           | H-terminated | Cu(111) | Ni(111) | Rh(111)  |                                   |
| ZZN                                                                                                                                                                               | 10.87                          | 5.95         | 5.5     | 4.47    | 3.26     | $\gamma^0 + \Delta\mu/3$          |
| ZZN57                                                                                                                                                                             | 10.29                          | 9.95         | 8.96    | 6.28    | 5.42     | $\gamma^0 + \Delta\mu/3$          |
| ZZN+B                                                                                                                                                                             | 19.30                          | 14.53        | 9.13    | 5.44    | 3.30     | $\gamma^0 - 2\Delta\mu/3$         |
| ZZB                                                                                                                                                                               | 12.96                          | 9.55         | 7.91    | 5.7     | 4.56     | $\gamma^0 - \Delta\mu/3$          |
| ZZB57                                                                                                                                                                             | 11.85                          | 11.25        | 9.43    | 5.93    | 6.19     | $\gamma^0 - \Delta\mu/3$          |
| ZZB+N                                                                                                                                                                             | 9.87                           | 7.27         | 4.73    | 3.29    | 2.31     | $\gamma^0 + 2\Delta\mu/3$         |
| AC                                                                                                                                                                                | 7.57                           | 7.44         | 6.84    | 4.49    | 3.09     | $\gamma^0$                        |
| AC677                                                                                                                                                                             | 11.91                          | 14.09        | 11.51   | 9.02    | Unstable | $\gamma^0$                        |
| AC+N                                                                                                                                                                              | 13.14                          | 11.21        | 7.33    | 7.17    | 5.47     | $\gamma^0 + \Delta\mu$            |
| AC+B                                                                                                                                                                              | 15.20                          | 17.85        | 10.75   | 6.77    | 4.61     | $\gamma^0 - \Delta\mu$            |
| AC-Ns                                                                                                                                                                             | 9.18                           | 14.43        | 9.57    | 7.25    | 5.91     | $\gamma^0 + 2\Delta\mu$           |
| AC-Bs                                                                                                                                                                             | 22.58                          | 24.68        | 16.29   | 12.08   | 10.80    | $\gamma^0 - 2\Delta\mu$           |
| Notes: The energies of H-terminated edges were calculated with $\mu_H = -4.74$ eV, which is calculated with pressure and temperature of $10^{-4}$ mbar and $10^3$ K. <sup>1</sup> |                                |              |         |         |          |                                   |

### 3. Magnetism in some typical models.

Table S2 Magnetism ( $\mu\text{B}$ ) summary of BN flakes/BNNRs with bare, H-terminated, and Cu(111)-, Ni(111)-, Rh(111)- passivated edges. The data in parentheses are those of corresponding Ni substrates. The magnetism of Cu(111) and Rh(111) without BN is zero.

| Magnetism<br>Edge types | Bare edges | H-<br>terminated | On Cu(111) | On Ni(111)         | On Rh(111) |
|-------------------------|------------|------------------|------------|--------------------|------------|
| ZZN                     | 6.00       | 0.00             | 0.00       | 177.70<br>(188.41) | 0.61       |
| ZZN+B                   | 2.00       | 0.00             | 0.00       | 64.00<br>(67.61)   | 0.00       |
| ZZB                     | 12.00      | 0.00             | 0.00       | 170.83<br>(188.41) | 0.51       |
| ZZB+N                   | 4.53       | 0.00             | 0.00       | 66.46<br>(67.61)   | 0.00       |
| AC-Ns                   | 0.00       | 0.00             | 0.00       | 79.87<br>(82.19)   | 0.00       |
| AC                      | 0.00       | 0.00             | 0.00       | 79.81<br>(82.19)   | 0.00       |
| AC+B                    | 2.00       | 2.00             | 0.00       | 77.66<br>(82.19)   | 0.00       |
| AC-Bs                   | 4.00       | 0.00             | 0.00       | 76.38<br>(82.19)   | 0.00       |

**4. Formation energies vs. orientations, Wulff shapes of h-BN on Cu(111), Ni(111) and Rh(111) at different chemical potential difference.**

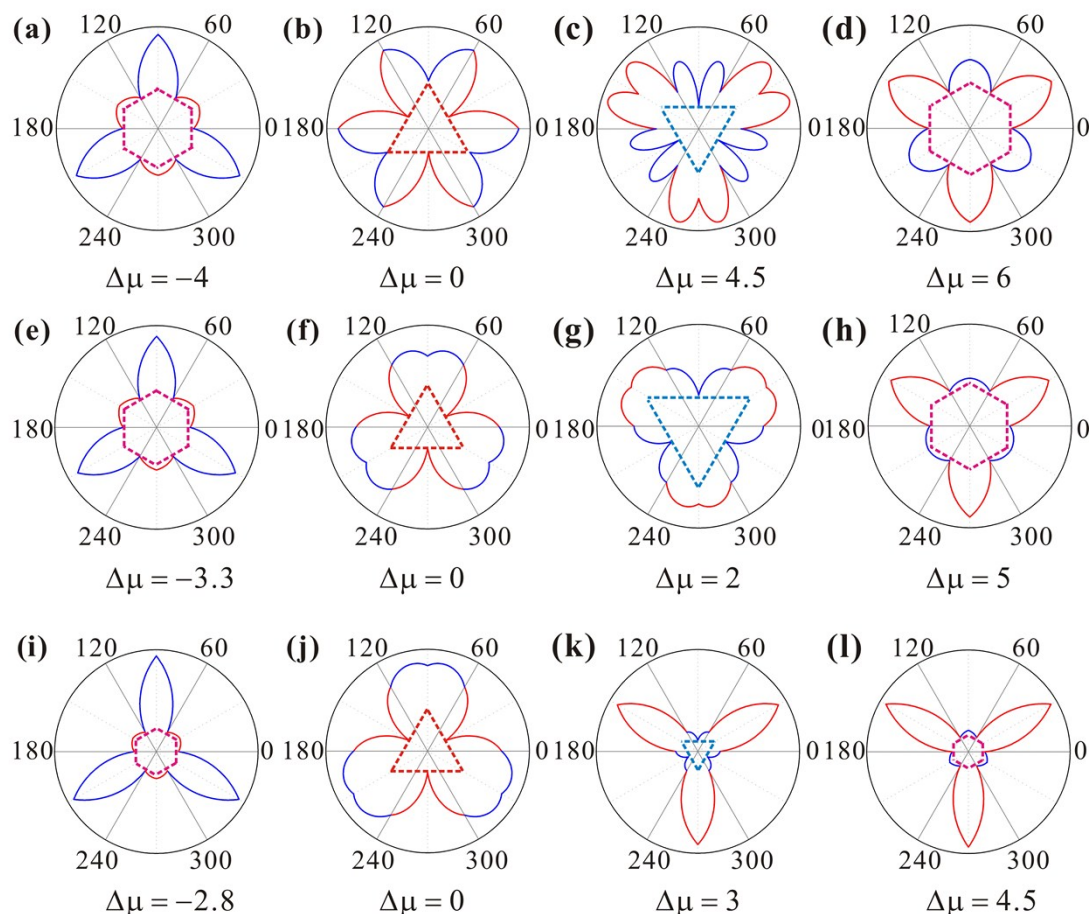

**Fig. S2** Formation energies vs. orientations of h-BN on Cu(111) (a-d), Ni(111) (e-h) and Rh(111) (i-l) at different chemical potential differences,  $\Delta\mu$ . Red and blue solid lines represent the B- and N-rich directions, respectively. The Wulff shapes of h-BN domains are also shown with dashed lines. Red, blue and purple dashed lines represent the shapes constructed with edges along ZZB, ZZN and AC directions, respectively.

(1) Zhao, R.; Gao, J.; Liu, Z.; Ding, F. *Nanoscale* 2015, 7, 9723.
